# Supplementary material
Source: Springer Nature journal article supplement (https://www.springermedizin.de/resource/supplementary/13229_2013_121_MOESM1_ESM.pdf/9676226)
Supplement: MOESM1 [file 9676226]

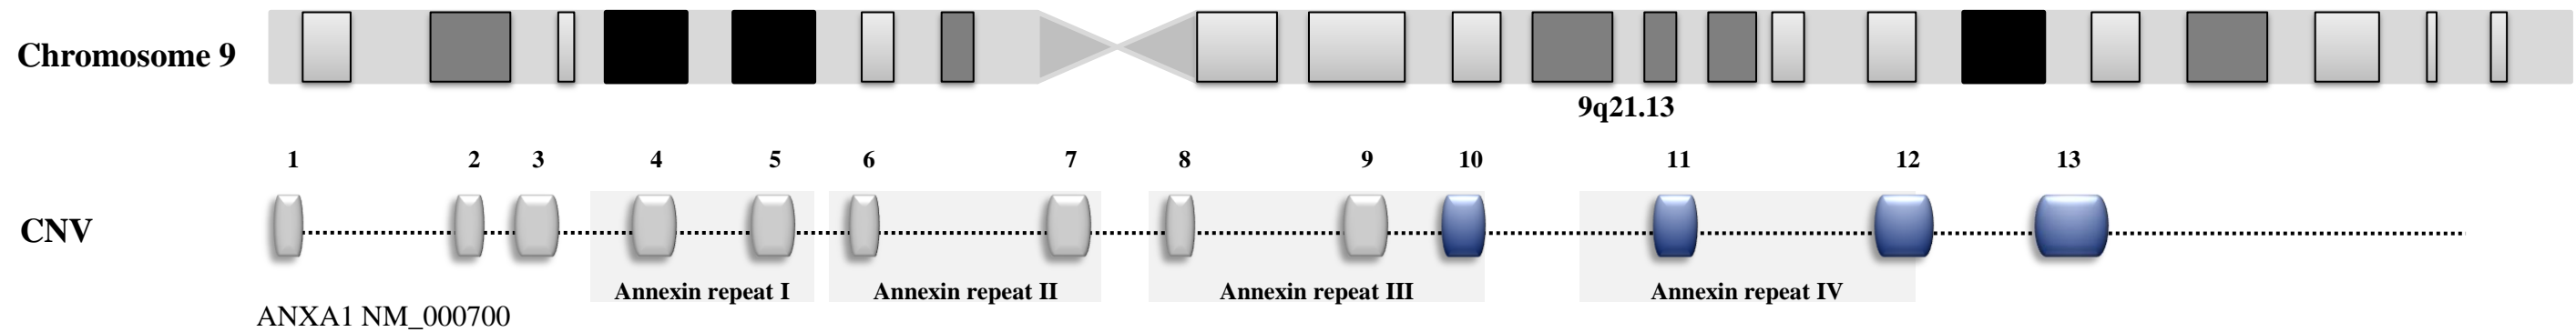

ASD dataset n=13

| Sample                                     | N    | Genotyping platform                                       | Reference in the main text |
|--------------------------------------------|------|-----------------------------------------------------------|----------------------------|
| AGP (discovery and follow-up sample)       | 2446 | Illumina Infinium 1M-single SNP or Illumina 1M-duo arrays | 13;21                      |
| AGRE (follow-up sample)                    | 1123 | Illumina 550K BeadChip and Illumina Omni-1 Quad arrays    | -                          |
| Ottawa (OHI)                               | 1234 | Affymetrix Genome-Wide Human SNP 6.0 array                | 23                         |
| Northern Germany (PopGen)                  | 1123 | Affymetrix Genome-Wide Human SNP 6.0 array                | 24                         |
| SAGE consortium                            | 1287 | Illumina Infinium 1M-single SNP array                     | 25                         |
| Children's Hospital of Philadelphia (CHOP) | 1320 | Illumina 550K BeadChip array                              | 26                         |

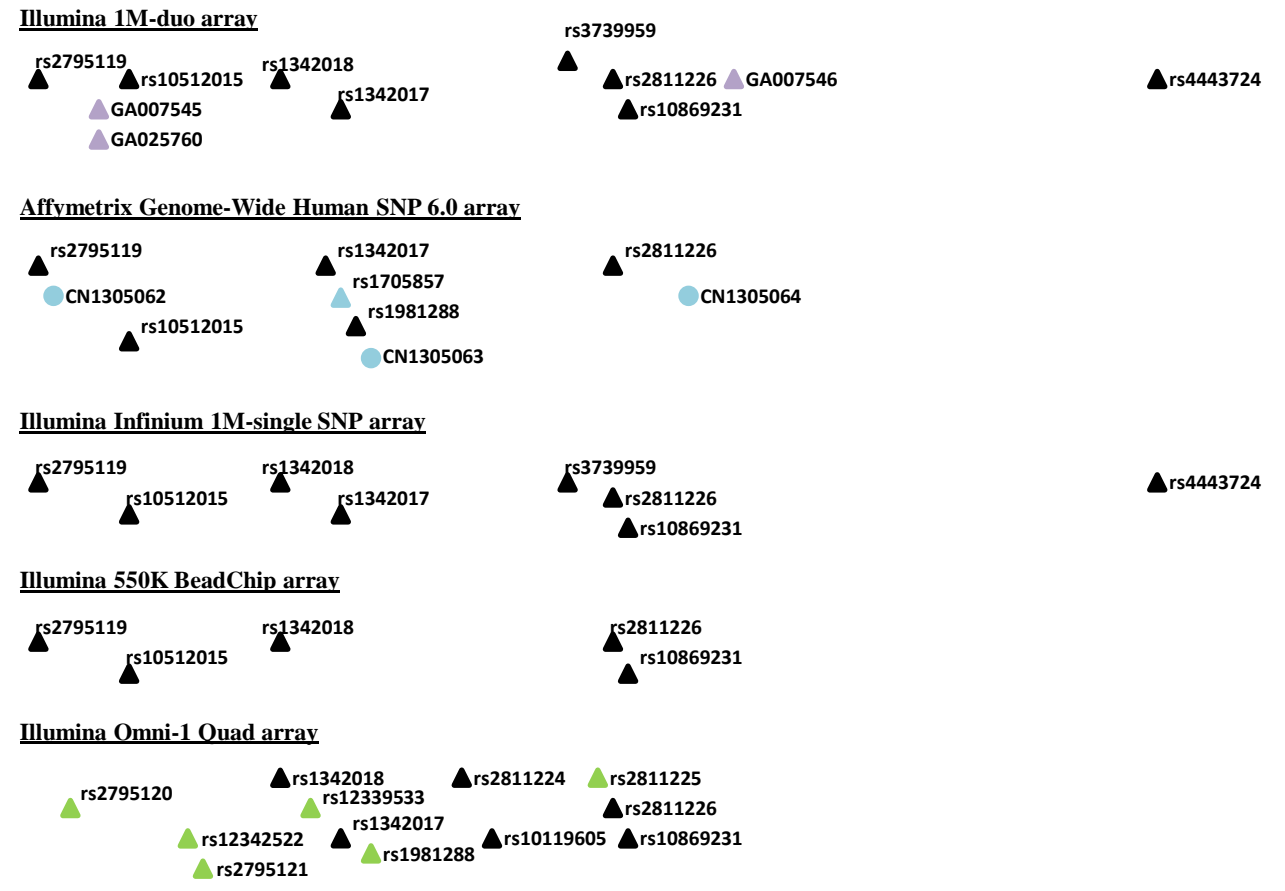

▲ Common SNPs between AGP discovery sample and follow-up and controls platforms  
 ▲ Illumina 1M-duo array specific SNPs.  
 ▲ Affymetrix Genome-Wide Human SNP 6.0 array specific SNPs.  
 ● Affymetrix Genome-Wide Human SNP 6.0 array CNV probes.  
 ▲ Illumina Omni-1 Quad array specific SNPs.

**Additional File 1.** Genotyping platform coverage of *ANXA1* duplicated region. SNPs that are common between the platforms used in the AGP discovery sample, the AGRE follow-up sample and control datasets are represented (black triangle). SNPs covered exclusively by the Illumina 1M-duo array (purple triangle), the Illumina Omni-1 Quad array (green triangle) and the Affymetrix Genome-Wide Human SNP 6.0 array (blue triangle) are also represented, as well as the 26 bp CNV probes (blue circle) of Affymetrix Genome-Wide Human SNP 6.0 array.

**Probes genomic coordinates:** rs2795119(chr9:74970534); GA007546(chr9:74970929); GA025760(chr9:74970930); rs10512015(chr9:74971066); rs1342018(chr9:74971951); rs1342017(chr9:74972330); rs3739959(chr9:74973757); rs2811226(chr9:74974084); rs10869231(chr9:74974147); GA007546(chr9:74974834); rs4443724(chr9:74977981); CN1305062(chr9:74970552-74970577); rs17058570(chr9:74972375-74972375); rs1981288(chr9:74972475); CN1305063(chr9:74972520-74972545); CN1305064(chr9:74974461-74974486); rs2795120(chr9:74971196); rs12342522(chr9:74971565); rs2795121(chr9:74971584); rs12339533(chr9:74971988); rs10119605(chr9:74973075); rs2811225(chr9:74974026); rs2811226(chr9:74974084).
